# Supplementary material for: Ag substituted Au clusters supported on Mg-Al-hydrotalcite for highly efficient base-free aerobic oxidation of 5-hydroxymethylfurfural to 2,5-furandicarboxylic acid
Source: Royal Society of Chemistry journal article supplement (doi:10.1039/d2gc02775e), 2022-01-01
Supplement: d2gc02775e1.pdf [file d2gc02775e1.pdf]

## Supporting Information

# **Ag substituted Au clusters supported on Mg-Al-hydrotalcite for highly efficient base-free aerobic oxidation of 5-hydroxymethylfurfural to 2,5-furandicarboxylic acid**

Zongyang Liu,<sup>a</sup> Yuan Tan,<sup>a,\*</sup> Jie Li,<sup>a</sup> Xiuli Li,<sup>a</sup> Yan Xiao,<sup>a</sup> Juan Su,<sup>a</sup> Xingkun Chen,<sup>a</sup> Botao Qiao,<sup>b</sup> Yunjie Ding,<sup>a,c,d,\*</sup>

<sup>a</sup> Hangzhou Institute of Advanced Studies, Zhejiang Normal University, 1108 Gengwen Road, Hangzhou 311231, P. R. China.

<sup>b</sup> CAS Key Laboratory of Science and Technology on Applied Catalysis, Dalian Institute of Chemical Physics, Chinese Academy Sciences, 116023 Dalian, China.

<sup>c</sup> Dalian National Laboratory for Clean Energy, Dalian Institute of Chemical Physics, Chinese Academy of Sciences 457 Zhongshan Road, Dalian 116023, China.

<sup>d</sup> The State Key Laboratory of Catalysis, Dalian Institute of Chemical Physics, Chinese Academy of Sciences 457 Zhongshan Road, Dalian 116023, China.

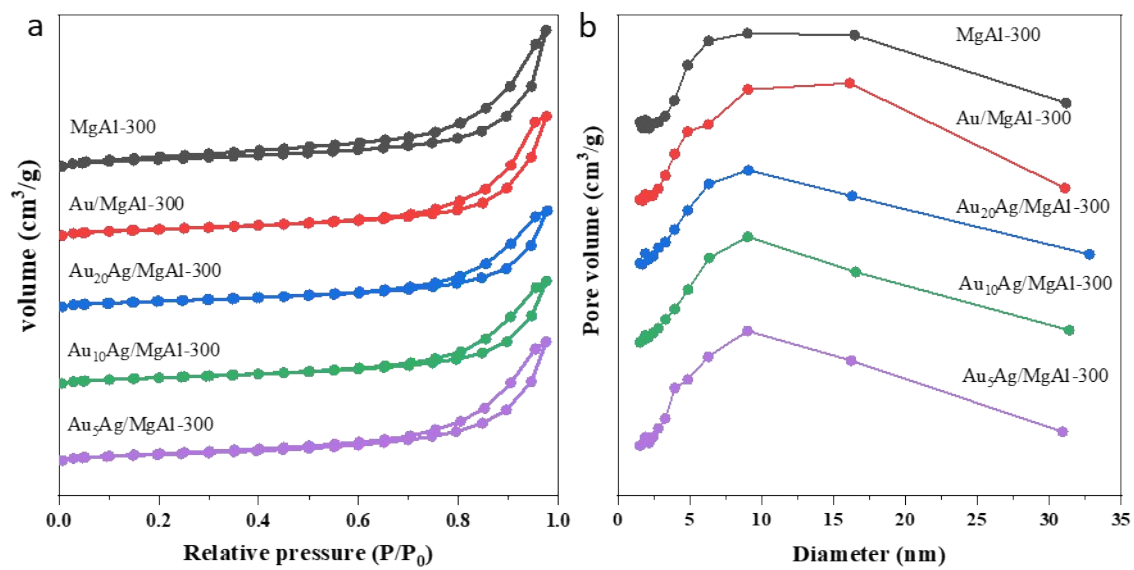

**Figure S1.** (a) N<sub>2</sub> physisorption isotherms and (b) BJH-pore size distributions of supported Au and Au-Ag bimetallic catalysts.

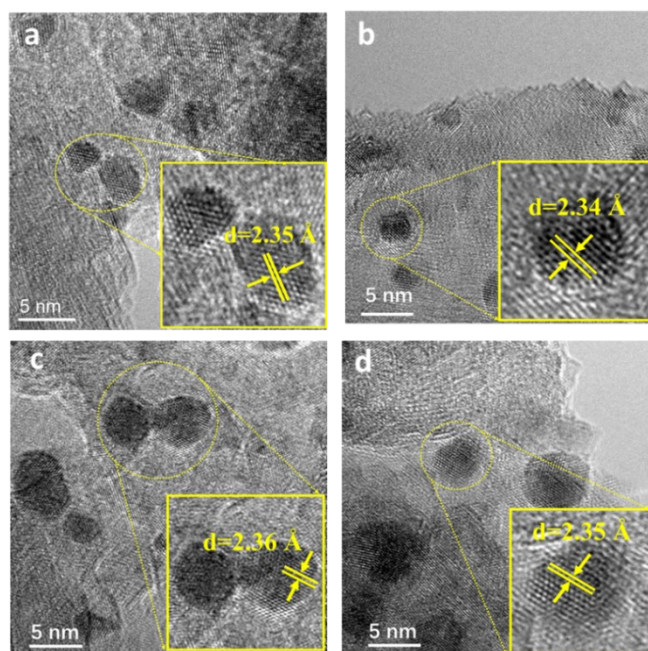

**Figure S2.** HRTEM images of supported Au and Au-Ag bimetallic catalysts: (a) Au/MgAl-300; (b) Au<sub>20</sub>Ag/MgAl-300; (c) Au<sub>10</sub>Ag/MgAl-300; (d) Au<sub>5</sub>Ag/MgAl-300.

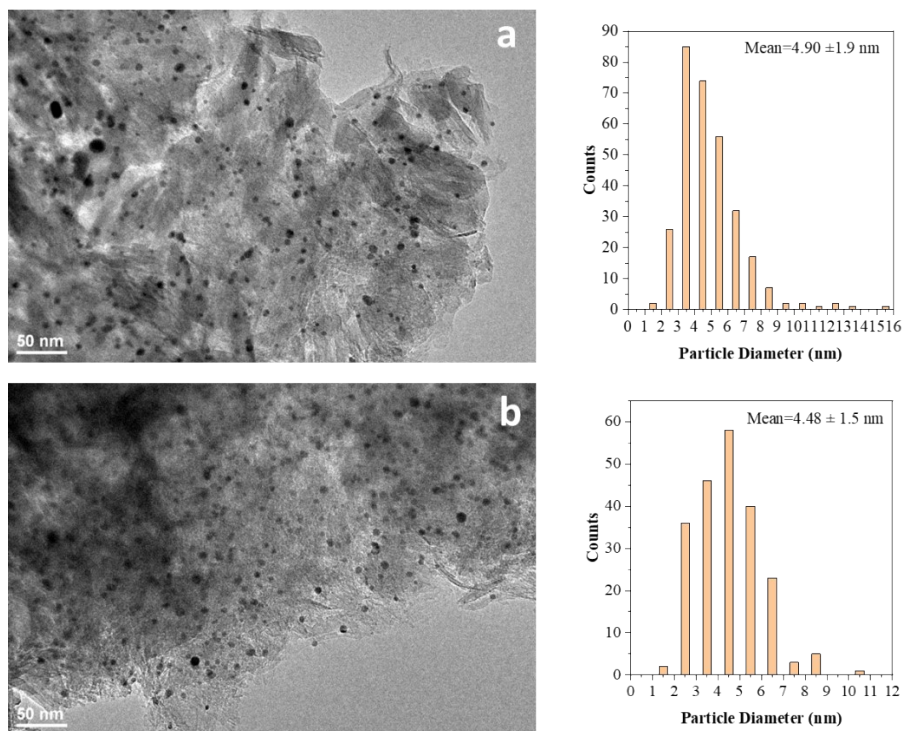

**Figure S3.** TEM images and histogram of size distributions of (a) Au/MgAl-300 and (b) Au<sub>20</sub>Ag/MgAl-300 catalysts after recycle for three times.

**Table S1.** Representative Au-based heterogeneous catalysts for aerobic oxidation of HMF to FDCA.

| Entry | Catalyst                                                | HMF/Metal<br>molar ratio | Base<br>additive                | T/<br>°C | P <sub>O<sub>2</sub></sub> /<br>atm | Time/<br>h | HMF<br>Conv. / % | FDCA<br>Sel. / % | Specific reaction rates<br>(mol <sub>HMF</sub> ·mol <sub>Au</sub> <sup>-1</sup> ·h <sup>-1</sup> ) | Catalytic productivity<br>(mol <sub>FDCA</sub> ·mol <sub>Au</sub> <sup>-1</sup> ·h <sup>-1</sup> ) | Ref.      |
|-------|---------------------------------------------------------|--------------------------|---------------------------------|----------|-------------------------------------|------------|------------------|------------------|----------------------------------------------------------------------------------------------------|----------------------------------------------------------------------------------------------------|-----------|
| 1     | Au/MgAl-300                                             | 70                       | no                              | 90       | 5                                   | 2          | 100              | 95.5             | 704.9                                                                                              | 17                                                                                                 | This work |
| 2     | Au <sub>20</sub> Ag <sub>1</sub> /MgAl-300              | 70                       | no                              | 90       | 5                                   | 2          | 100              | 95.5             | 748.6                                                                                              | 33.3                                                                                               | This work |
| 3     | Au/HT                                                   | 40                       | no                              | 95       | 1                                   | 7          | >99              | >99              | 36                                                                                                 | 5.7                                                                                                | 1         |
| 4     | Au/MgO                                                  | 50                       | no                              | 110      | 5.5                                 | 2          | 99               | 91               | 25                                                                                                 | 22.5                                                                                               | 2         |
| 5     | Au/nNiO                                                 | 100                      | no                              | 90       | 10                                  | 6          | 71               | 25               | 19                                                                                                 | 3                                                                                                  | 3         |
| 6     | Au/HT-AC                                                | 100                      | no                              | 100      | 5                                   | 24         | 100              | >99              | 38                                                                                                 | 8.3                                                                                                | 4         |
| 7     | Pd/HT-5                                                 | 20                       | no                              | 100      | 1                                   | 8          | 100              | >99              | 18.8                                                                                               | 2.5                                                                                                | 5         |
| 8     | Pd <sub>20</sub> Pt <sub>80</sub> -PVP/HT               | 75                       | no                              | 95       | 1                                   | 11.5       | 100              | >99              | 27                                                                                                 | 6.5                                                                                                | 6         |
| 9     | Pt/NC-CeO <sub>2</sub>                                  | 163                      | no                              | 150      | 4                                   | 2          | 100              | 99               | 114                                                                                                | 81.4                                                                                               | 7         |
| 10    | Pt/NiO                                                  | 200                      | no                              | 100      | 10                                  | 12         | 100              | 100              | 124                                                                                                | 22.2                                                                                               | 8         |
| 11    | AuPd/La-CaMgAl-<br>LDH                                  | 53                       | no                              | 120      | 5                                   | 2          | 96               | 91               | 64                                                                                                 | 23                                                                                                 | 9         |
| 12    | AuPd/CNT                                                | 100                      | no                              | 100      | 5                                   | 12         | 100              | 94               | 80                                                                                                 | 7.8                                                                                                | 10        |
| 13    | AuPd/nNiO                                               | 100                      | no                              | 90       | 10                                  | 6          | 95               | 70               | 82                                                                                                 | 11.1                                                                                               | 3         |
| 14    | Au/SiO <sub>2</sub>                                     | 72                       | NaHCO <sub>3</sub>              | 90       | 10                                  | 5          | >99              | 74               | 14                                                                                                 | 10.7                                                                                               | 11        |
| 15    | Au/CeO <sub>2</sub>                                     | 78                       | Na <sub>2</sub> CO <sub>3</sub> | 140      | 5                                   | 15         | >99.9            | 91               | 64                                                                                                 | 4.7                                                                                                | 12        |
| 16    | Au/TiO <sub>2</sub>                                     | 100                      | NaOH                            | 30       | 20                                  | 18         | 100              | 71               | 5.6                                                                                                | 3.9                                                                                                | 13        |
| 17    | Au/MZ-600                                               | 143                      | NaOH                            | 95       | 1                                   | 4          | 100              | 95               | 72                                                                                                 | 34                                                                                                 | 14        |
| 18    | Au/HSAG-N                                               | 160                      | NaHCO <sub>3</sub>              | 90       | 10                                  | 12         | >99              | 75               | 1195                                                                                               | 10                                                                                                 | 15        |
| 19    | Au/ZrO <sub>2</sub>                                     | 373                      | NaOH                            | 125      | 10.5                                | 5          | 100              | 89               | 75                                                                                                 | 67                                                                                                 | 16        |
| 20    | Au <sub>1</sub> Pd <sub>3</sub> /pBN <sub>2</sub> C-800 | 35                       | Na <sub>2</sub> CO <sub>3</sub> | 100      | 30                                  | 24         | 100              | 97.6             | 29                                                                                                 | 2                                                                                                  | 17        |
| 21    | Ag <sub>3</sub> Au <sub>7</sub> /ZrO <sub>2</sub>       | 100                      | NaOH                            | 125      | 2.1                                 | 5          | 100              | 95               | 20                                                                                                 | 19                                                                                                 | 18        |
| 22    | Au <sub>1</sub> Pd <sub>1</sub> /PECN                   | 100                      | K <sub>2</sub> CO <sub>3</sub>  | 90       | 1                                   | 12         | 99.7             | 99               | 190                                                                                                | 8.3                                                                                                | 19        |
| 23    | AuPd/IRA-743                                            | 100                      | Na <sub>2</sub> CO <sub>3</sub> | 100      | 10                                  | 4          | 100              | 93               | 60                                                                                                 | 23                                                                                                 | 20        |

|    |                                     |     |                    |    |    |   |     |     |     |    |    |
|----|-------------------------------------|-----|--------------------|----|----|---|-----|-----|-----|----|----|
| 24 | AuPd/ZOC                            | 100 | NaHCO <sub>3</sub> | 80 | 3  | 4 | >99 | >99 | 74  | 25 | 21 |
| 25 | AuCu/TiO <sub>2</sub>               | 100 | NaOH               | 95 | 10 | 4 | >99 | 99  | 130 | 25 | 22 |
| 26 | Au <sub>8</sub> Pd <sub>2</sub> /AC | 200 | NaOH               | 60 | 3  | 2 | >99 | 99  | 100 | 99 | 23 |

---

**Table S2.** The original data for drawing the Arrhenius plots for HMF oxidation over the Au/MgAl-300 and Au<sub>20</sub>Ag/MgAl-300 catalysts.

| Au/MgAl-300         |                   |                     |       | Au <sub>20</sub> Ag/MgAl-300 |                   |                     |       |
|---------------------|-------------------|---------------------|-------|------------------------------|-------------------|---------------------|-------|
| Temperature<br>(°C) | Conversion<br>(%) | 10 <sup>4</sup> /RT | ln(r) | Temperature<br>(°C)          | Conversion<br>(%) | 10 <sup>4</sup> /RT | ln(r) |
| 75                  | 7.05              | 3.45                | -2.88 | 75                           | 10.94             | 3.45                | -2.44 |
| 85                  | 9.80              | 3.36                | -2.55 | 85                           | 12.06             | 3.36                | -2.34 |
| 95                  | 11.04             | 3.27                | -2.43 | 95                           | 13.51             | 3.27                | -2.22 |
| 105                 | 16.15             | 3.18                | -2.05 | 105                          | 16.62             | 3.18                | -2.02 |
| 115                 | 24.36             | 3.10                | -1.64 | 115                          | 22.67             | 3.10                | -1.71 |

## References

1. N. K. Gupta, S. Nishimura, A. Takagaki, K. Ebitani. *Green Chem.*, **2011**, *13*, 824-827.
2. C. P. Ferraz, M. Zielinski, M. Pietrowski, S. Heyte. *ACS Sustainable Chem. Eng.*, **2018**, *6*, 16332-16340.
3. D. Bonincontro, A. Lolli, A. Villa, L. Prati. *Green Chem.*, **2019**, *21*, 4090-4099.
4. T. Gao, T. Gao, W. Fang, Q. Cao. *Mol. Catal.*, **2017**, *439*, 171-179.
5. Y. Wang, K. Yu, D. Lei, W. Si, Y. Feng, S. Liu. *ACS Sustain. Chem. Eng.*, **2016**, *4*, 4752-4761.
6. H. Choudhary, K. Ebitani. *Chem. Lett.*, **2016**, *45*, 613-615.
7. C. Ke, M. Li, G. Fan, L. Yang, F. Li. *Chemistry*, **2018**, *13*, 2714-2722.
8. H. Zhang, T. Gao, Q. Cao, W. Fang. *ACS Sustainable Chem. Eng.*, **2021**, *9*, 6056-6067.
9. Z. Gao, R. Xie, G. Fan, L. Yang. *ACS Sustainable Chem. Eng.*, **2017**, *5*, 5852-5861.
10. X. Wan, C. Zhou, J. Chen, W. Deng. *ACS Catal.*, **2014**, *4*, 2175-2185.
11. N. Masoud, B. Donoeva, P. E. Jongh. *Appl. Catal. A-Gen.*, **2018**, *561*, 150-157.
12. M. Kim, Y. Su, A. Fukuoka, E. J. M. Hensen. *Angew. Chem. Int. Ed.*, **2018**, *57*, 8235 - 8239.
13. Y. Y. Gorbanev, S. K. Klitgaard, J. M. Woodley, C. H. Christensen. *ChemSusChem*, **2009**, *2*, 672-675.
14. A. I. M. Rabee, S. D. Le, K. Higashimine, S. Nishimura. *ACS Sustainable Chem. Eng.*, **2020**, *8*, 7150-7161.
15. B. Donoeva, N. Masoud, P. E. Jongh. *ACS Catal.*, **2017**, *7*, 4581-4591.
16. O. R. Schade, K. F. Kalz, D. Neukum, W. Kleist. *Green Chem.*, **2018**, *20*, 3530-3541.
17. W. Guan, Y. Zhang, Y. Chen, J. Wu. *J. Catal.*, **2021**, *396*, 40-53.
18. O. R. Schade, F. Stein, S. Reichenberger, A. Gaur. *Adv. Synth. Catal.*, **2020**, *362*, 5681-5696.
19. Q. Wang, W. Hou, S. Li, J. Xie. *Green Chem.*, **2017**, *19*, 3820-3830.
20. C. A. Antonyraj, S. K. Parka, S. S, J. K. Cho. *Appl. Catal. A-Gen.*, **2017**, *547*, 230-236.
21. Z. Gui, W. Cao, S. Saravanamurugan, A. Riisager. *ChemCatChem*, **2016**, *8*, 3636-3643.



22. T. Pasini, M. Piccinini, M. Blosi, R. Bonelli. *Green Chem.*, **2011**, *13*, 2091-2099.
23. A. Villa, M. Schiavoni, S. Campisi , G. M. Veith. *ChemSusChem*, **2013**, *6*, 609-612.
